# Supplementary material
Source: PubMed Central journal article supplement (PMC3230052)
Supplement: supp_en.2011-1298v1_en-11-1298_Fig_1.pdf [file supp_en.2011-1298v1_en-11-1298_Fig_1.pdf]

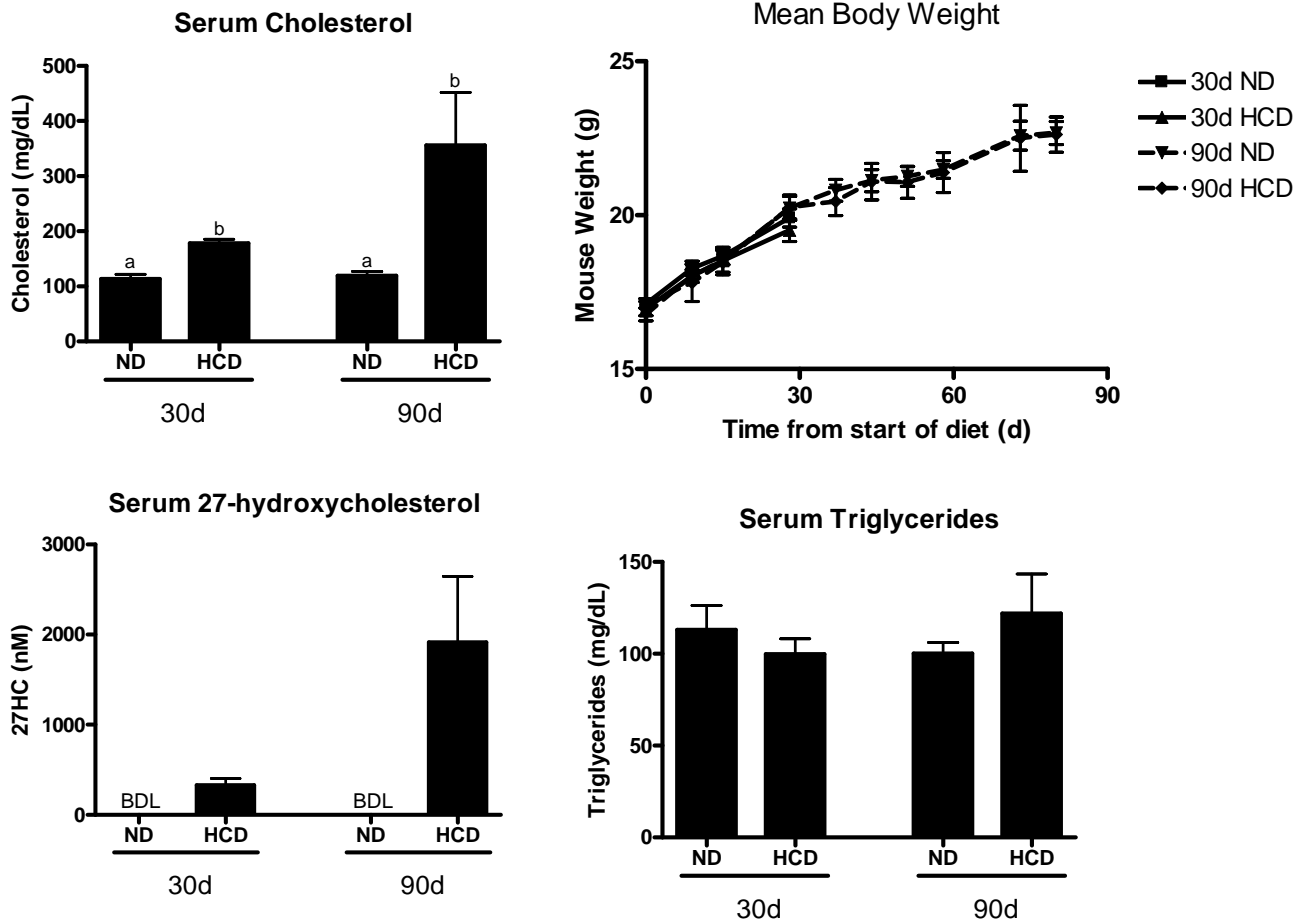

Supplemental Figure 1: **High Cholesterol Diet elevates serum 27HC without altering body weight.** Serum cholesterol and 27HC concentrations were determined by LC/MS. ND: normal diet, HCD: high cholesterol diet, BDL: below detection limits of assay. Different letters denote statistical significance ( $P < 0.05$ ).
